# Supplementary material for: Crystal structure of Streptococcus pneumoniae pneumolysin provides key insights into early steps of pore formation
Source: PubMed Central journal article supplement (PMC4585913; doi:10.1038/srep14352), 2015-09-25
Supplement: srep14352-s1.pdf [file srep14352-s1.pdf]

# **Crystal structure of *Streptococcus pneumoniae***

## **pneumolysin provides key insights into early steps of pore formation**

Sara L. Lawrence<sup>1\*</sup>, Susanne C. Feil<sup>1\*</sup>, Craig J. Morton<sup>1\*</sup>, Allison J. Farrand<sup>2\*</sup>,  
Terrence D. Mulhern<sup>3</sup>, Michael A. Gorman<sup>1</sup>, Kristin R. Wade<sup>2</sup>, Rodney K. Tweten<sup>2</sup> &  
Michael W. Parker<sup>1,2</sup>

<sup>1</sup>ACRF Rational Drug Discovery Centre, St. Vincent's Institute of Medical Research, Fitzroy, Victoria 3065, Australia, <sup>2</sup>Department of Microbiology and Immunology, University of Oklahoma Health Sciences Center, Oklahoma City, Oklahoma 73104, USA, <sup>3</sup>Department of Biochemistry and Molecular Biology, Bio21 Molecular Science and Biotechnology Institute, The University of Melbourne, Parkville, Victoria 3010, Australia.

\*Equal first authors

Correspondence and requests for materials should be addressed to M.W.P.  
(mparker@svi.edu.au)

## Supplementary Figures

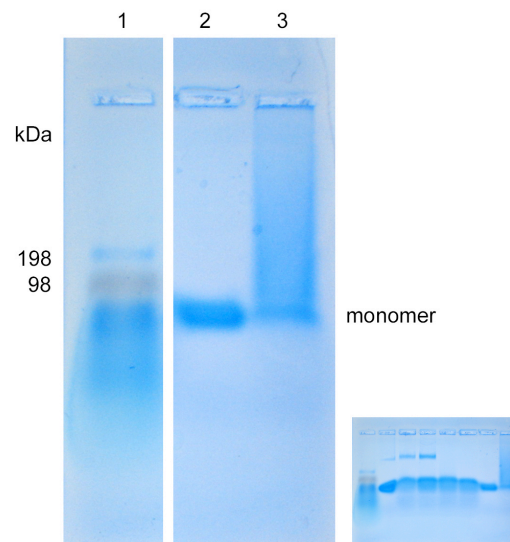

**Figure S1.** SDS-AGE gel of SDS and heat solubilised PLY crystals. PLY crystals were solubilised in SDS non-reducing buffer and boiled (lane 3), prior to loading onto a SDS-AGE gel (1.5% agarose/ Tricine). Protein standard size marker SeeBlue® Plus2 (lane 1) and 1 µg solution of PLY monomer (lane 2) were run for comparison. The PLY crystal sample shows a continuous size population of PLY species from monomer to high molecular oligomer. The whole gel from which these lanes were derived is shown in the inset.

## Supplementary Tables

**Supp. Table S1.** Intermolecular contacts in linear oligomers of PLY, ILY and LLY

| Protein | Contacts (Monomer 1 : Monomer 2)                                                                                                                                                                                                                                                                                                                                                                                                                                                                                                                                                                                                                                                                                |
|---------|-----------------------------------------------------------------------------------------------------------------------------------------------------------------------------------------------------------------------------------------------------------------------------------------------------------------------------------------------------------------------------------------------------------------------------------------------------------------------------------------------------------------------------------------------------------------------------------------------------------------------------------------------------------------------------------------------------------------|
| ILY     | R127 (D3) : I399 (D1)<br>L144 (D1) : I399 (D1)<br>K229 (D3) : I399 (D1)<br>N235 (D3) : D322 (D3) (HB)<br>V360 (D3) : K326 (D3)<br>C361 (D3) : K326 (D3)<br>H465 (D4) : R495 (D4) (HB)<br>Y466 (D4) : R495 (D4)<br>T468 (D4) : L496 (D4)<br>K473 (D4) : D502 (D4) (SB)                                                                                                                                                                                                                                                                                                                                                                                                                                           |
| LLO     | A120 (D1) : L397 (D1)<br>L124 (D1) : E396 (D1)<br>E136 (D1) : N73 (D1) (HB)<br>Q141 (D1) : N73 (D1)<br>V144 (D1) : E396 (D1)<br>K175 (D1) : E262 (D1) (SB), N395 (D1)<br>S176 (D1) : P41 (D1)<br>N230 (D3) : N109 (D2) (HB), Q110 (D2)<br>D354 (D3) : K203 (D1)<br>E355 (D3) : K203 (D1), I204 (D3) (HB)<br>L461 (D4) : W489 (D4)<br>Y469 (D4) : D497 (D4), R499 (D4)                                                                                                                                                                                                                                                                                                                                           |
| PLY     | N66 (D1) : S239 (D1)<br>S68 (D1) : D205 (D1), A206 (D1) (HB)<br>R69 (D1) : N339 (D1), V341 (D1)<br>T81 (D1) : K17 (D1)<br>N86 (D1) : V340 (D1) (HB), V341 (D1) (HB)<br>T88 (D1) : D338 (D1), V340 (D1)<br>L89 (D1) : D338 (D1)<br>A91 (D1) : R208 (D1)<br>V92 (D1) : R208 (D1)<br>D93 (D1) : R208 (D1) (SB)<br>N120 (D1) : D205 (D1)<br>S121 (D1) : F112 (D1), D205 (D1) (HB)<br>R124 (D1) : F112 (D1)<br>G125 (D1) : S108 (D1)<br>N128 (D1) : S108 (D1)<br>E170 (D3) : S56 (D2)<br>K171 (D3) : S58 (D1), D59 (D1)<br>N174 (D3) : T55 (D2), S56 (D2), T57 (D2), E151 (D3)<br>S175 (D3) : E151 (D3)<br>D177 (D3) : Y150 (D3), E151 (D3), K152 (D3)<br>N181 (D3) : R51 (D2)<br>Q225 (D1) : L11 (D1), D8 (D1) (HB) |

|  |                                                                                                                                                                                                                                                                                                                                                                                                                                                                                                 |
|--|-------------------------------------------------------------------------------------------------------------------------------------------------------------------------------------------------------------------------------------------------------------------------------------------------------------------------------------------------------------------------------------------------------------------------------------------------------------------------------------------------|
|  | R226 (D1) : L11 (D1), N209 (D1) (HB)<br>E286 (D3) : A265 (D3)<br>K288 (D3) : Y150 (D3), E264 (D3) (SB)<br>P296 (D3) : R147 (D1)<br>S298 (D3) : D102 (D1) (HB), R147 (D1) (HB)<br>A300 (D3) : Q149 (D3)<br>R301 (D3) : R147 (D1), M148 (D3)<br>V302 (D3) : M148 (D3) (HB), Q149 (D3), Y150 (D3)<br>T304 (D3) : K268 (D3)<br>G305 (D3) : K268 (D3)<br>M309 (D3) : K268 (D3), V270 (D3)<br>D398 (D4) : K442 (D4), T443 (D4)<br>R399 (D4) : E441 (D4) (HB), K442 (D4)<br>Q402 (D4) : E441 (D4) (HB) |
|--|-------------------------------------------------------------------------------------------------------------------------------------------------------------------------------------------------------------------------------------------------------------------------------------------------------------------------------------------------------------------------------------------------------------------------------------------------------------------------------------------------|

D1 – domain 1, D2 – domain 2, D3 – domain 3, D4 – domain 4, HB – hydrogen bond, SB – salt bridge

**Supp. Table S2.** Dynamic light scattering data

| Sample | Temperature<br>(°C) | <i>n</i> | Particle<br>Diameter<br>(nm) | Standard<br>deviation<br>(nm) | Peak (%) |
|--------|---------------------|----------|------------------------------|-------------------------------|----------|
| PLY    | 25                  | 3        | 6.6                          | 0.9                           | 99.6     |
| PLY    | 37                  | 3        | 3445                         | 833                           | 100      |

**Supp. Table S3.** SAXS data collection and scattering-derived parameters

---

| Data-collection parameters                             |                                                                                      |
|--------------------------------------------------------|--------------------------------------------------------------------------------------|
| Instrument                                             | Australian Synchrotron SAXS/WAXS beamline with in-line size exclusion chromatography |
| Beam geometry                                          | Point collimation (250 $\mu\text{m}$ horizontal $\times$ 120 $\mu\text{m}$ vertical) |
| Wavelength ( $\text{\AA}$ )                            | 1.03320                                                                              |
| $q$ range ( $\text{\AA}^{-1}$ )                        | 0.0149-0.2583 (189 data points)                                                      |
| Exposure time (s)                                      | $41 \times 2$                                                                        |
| Concentration (mg/ml)                                  | 0.08                                                                                 |
| Temperature (K)                                        | 298                                                                                  |
| Structural parameters <sup>a</sup>                     |                                                                                      |
| $I(0)$ ( $\text{cm}^{-1}$ ) [from $P(r)$ ]             | $0.00450 \pm 0.00003$                                                                |
| $R_g$ ( $\text{\AA}$ ) [from $P(r)$ ]                  | $34.5 \pm 0.4$                                                                       |
| $I(0)$ ( $\text{cm}^{-1}$ ) (from Guinier)             | $0.00444 \pm 0.00004$                                                                |
| $R_g$ ( $\text{\AA}$ ) (from Guinier)                  | $32.9 \pm 0.5$                                                                       |
| $D_{\text{max}}$ ( $\text{\AA}$ )                      | $114.5 \pm 3^b$                                                                      |
| Porod volume estimate ( $\text{\AA}^3$ )               | $72489 \pm 787$                                                                      |
| Dry volume calculated from sequence ( $\text{\AA}^3$ ) | 64005                                                                                |
| Molecular mass determination <sup>a</sup>              |                                                                                      |
| Molecular mass Mr [from Porod volume] (kDa)            | $53.8 \pm 0.5^c$                                                                     |

<sup>a</sup> Reported for the averaged SAXS data

<sup>b</sup>  $D_{\text{max}}$  is a model parameter and uncertainty is based on  $P(r)$  analyses with a range of  $D_{\text{max}}$  values

<sup>c</sup> Calculated from the Porod volume using a partial specific volume of  $0.7425 \text{ cm}^3 \text{ g}^{-1}$  by the method of Mylonas & Svergun<sup>1</sup>.

**Supp. Table S4.** Carbohydrate docking scores<sup>a</sup>

|               | <b>Sialyl-Lewis X</b> | <b>Lewis B</b> | <b>Mannose</b> |
|---------------|-----------------------|----------------|----------------|
| <b>Site 1</b> | 5.95                  | 9.24           | 2.06           |
| <b>Site 2</b> | 13.61                 | 10.14          | 6.22           |

<sup>a</sup> Scores reported are the negative of the Surflex score, which is a theoretical  $K_D$  value for formation of the docked complex (Surflex manual, [www.certara.com](http://www.certara.com)).

**Supp. Table S5.** Crystallographic data and refinement statistics*A. Data collection statistics*

|                        |               |
|------------------------|---------------|
| Temperature (K)        | 100           |
| Space group            | $P2_12_12_1$  |
| Cell dimensions (Å)    |               |
| <i>a</i>               | 24.9          |
| <i>b</i>               | 133.6         |
| <i>c</i>               | 220.5         |
| Resolution (Å)         | 2.9           |
| No. observations       | 105956        |
| No. unique reflections | 17539         |
| Redundancy             | 6.0 (6.1)     |
| Data completeness (%)  | 99.4 (96.6)   |
| $I/\sigma_I$           | 12.2 (3.2)    |
| $R_{pim}$ (%)          | 6.9 (30.2)    |
| $CC(1/2)$              | 0.995 (0.897) |
| $R_{merge}$ (%)        | 15.7 (69.3)   |

*B. Refinement statistics*

|                                                              |      |
|--------------------------------------------------------------|------|
| Non-hydrogen atoms                                           |      |
| Protein                                                      | 3744 |
| Water                                                        | 29   |
| Ligands                                                      | 39   |
| Resolution (Å)                                               | 2.9  |
| $R_{work}$ (%)                                               | 19.9 |
| $R_{free}$ (%)                                               | 30.7 |
| r.m.s deviations from ideality                               |      |
| Bond lengths (Å)                                             | 0.02 |
| Bond angles (°)                                              | 1.9  |
| Average <i>B</i> -factor (Å <sup>2</sup> )                   |      |
| Main-chain                                                   | 68.6 |
| Side-chain                                                   | 68.9 |
| Water                                                        | 40.0 |
| Residues in the allowed regions of the Ramachandran plot (%) | 97.7 |

The values in parentheses are for the highest resolution bin (approximately 0.1 Å width).



## References

1. Mylonas, E. & Svergun D.I. Accuracy of molecular mass determination of proteins in solution by small-angle X-ray scattering. *J. Appl. Cryst.* **40**, s245-s249 (2007).
